# Supplementary material for: Zr modified SrNbO2N as an active photocatalyst for water oxidation under visible light illumination
Source: Royal Society of Chemistry journal article supplement (doi:10.1039/d0qi00315h), 2020-01-01
Supplement: d0qi00315h1.pdf [file d0qi00315h1.pdf]

## Supplementary Information

### Zr modified SrNbO<sub>2</sub>N as active photocatalyst for water oxidation under visible light illumination

Guoan Lin<sup>a,b</sup>, Ran Wang<sup>a,b</sup>, Tongcheng Cao<sup>\*a</sup>, Liangxi Yuan<sup>\*c</sup> and Xiaoxiang Xu<sup>\*a,b</sup>

*<sup>a</sup>Shanghai Key Lab of Chemical Assessment and Sustainability, School of Chemical Science and Engineering, Tongji University, 1239 Siping Road, Shanghai, 200092, China. E-mail: [xxxu@tongji.edu.cn](mailto:xxxu@tongji.edu.cn); [ctc@tongji.edu.cn](mailto:ctc@tongji.edu.cn); Tel: +86-21-65986919.*

*<sup>b</sup>Clinical and Central Lab, Putuo People's Hospital, Tongji University, 1291 Jiangning Road, Shanghai, 200060, China.*

*<sup>c</sup>Vascular department, Changhai hospital, Navy Military Medical University, Shanghai, 200433, China. Email: [yuanlx116@163.com](mailto:yuanlx116@163.com)*

#### List of Content

Figure S1. TGA curves of SrNb<sub>1-x</sub>Zr<sub>x</sub>O<sub>2+y</sub>N<sub>1-y</sub> (0 ≤ x ≤ 1) from room temperature to 1473 K in air. These metal oxynitrides will be oxidized above 400 °C and a mass increase is seen due to the replacements of N with O. Nitrogen content can be qualitatively evaluated by the mass increase and is consistent with the trend of theoretical values that Zr leads to decrement of N content.

Page S3

Figure S2. X-ray photoelectron spectroscopy spectra of as prepared samples  $\text{SrNb}_{1-x}\text{Zr}_x\text{O}_{2+y}\text{N}_{1-y}$  ( $0 \leq x \leq 1$ ): (a) Nb 3d, (b) O 1s, (c) N 1s, (d) Zr 3d. Page S4

Figure S3. Element mapping of  $\text{SrNb}_{0.2}\text{Zr}_{0.8}\text{O}_{2+y}\text{N}_{1-y}$  ( $x = 0.8$ ) under scanning electron microscopy conditions. Page S5

Figure S4. (a) Transmission electron microscopy (TEM) and (b) high resolution TEM images of  $\text{SrNb}_{0.2}\text{Zr}_{0.8}\text{O}_{2+y}\text{N}_{1-y}$  ( $x = 0.8$ ), lattice fringes marked corresponds to (110) planes. Page S5

Figure S5. (a) Recycling tests for  $\text{O}_2$  evolution on  $\text{SrNb}_{0.2}\text{Zr}_{0.8}\text{O}_{2+y}\text{N}_{1-y}$  ( $x = 0.8$ ) under visible light illumination ( $\lambda \geq 400$  nm), 0.05 M  $\text{Na}_2\text{S}_2\text{O}_8$  aqueous solutions and 1 wt%  $\text{CoO}_x$  were used as a sacrificial agent and cocatalyst, respectively; (b) XRD of  $\text{SrNb}_{0.2}\text{Zr}_{0.8}\text{O}_{2+y}\text{N}_{1-y}$  ( $x = 0.8$ ) after before and after photocatalytic experiment. Page S6

Table S1. AQE of oxynitride photocatalysts for  $\text{O}_2$  evolution from aqueous solutions Page S6

References

Page S6-S7

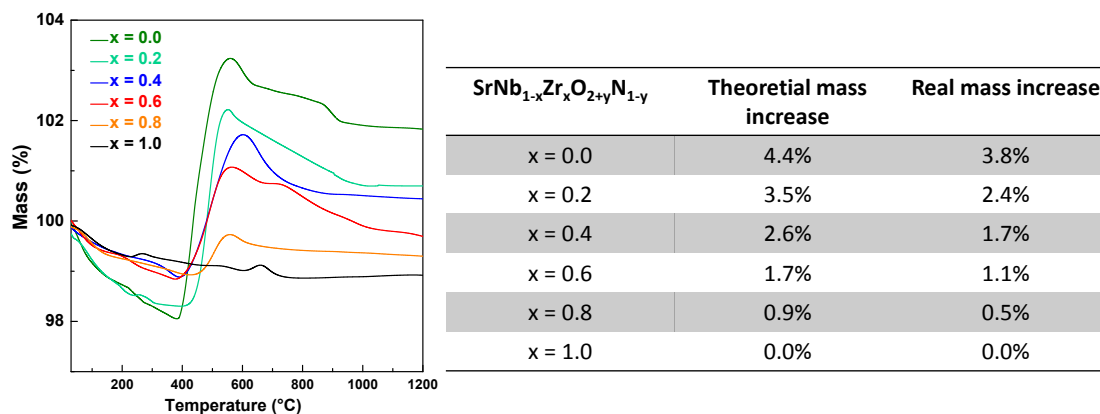

Figure S1. TGA curves of  $\text{SrNb}_{1-x}\text{Zr}_x\text{O}_{2+y}\text{N}_{1-y}$  ( $0 \leq x \leq 1$ ) from room temperature to 1473 K in air. These metal oxynitrides will be oxidized above 400 °C and a mass increase is seen due to the replacements of N with O. Nitrogen content can be qualitatively evaluated by the mass increase and is consistent with the trend of theoretical values that Zr leads to decrement of N content.

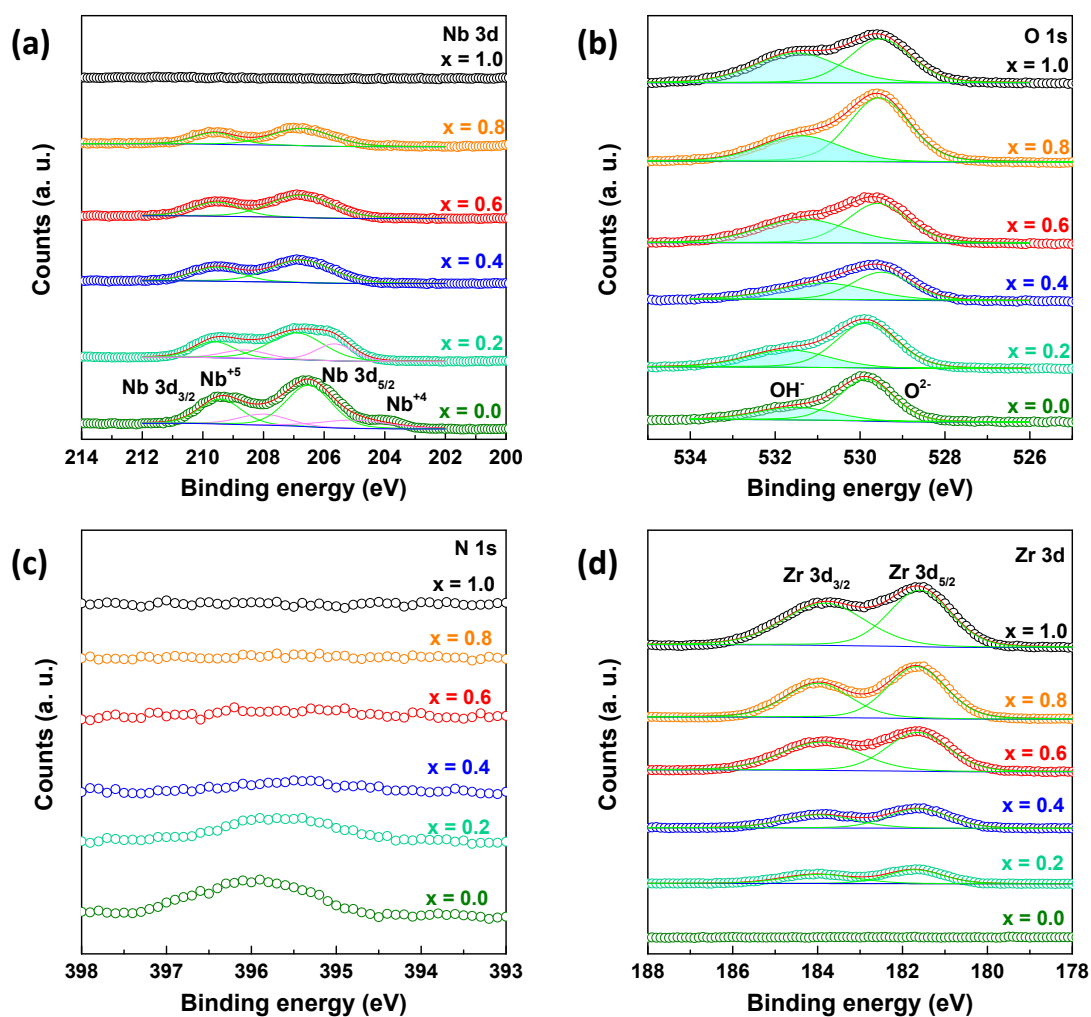

Figure S2. X-ray photoelectron spectroscopy spectra of as prepared samples  $\text{SrNb}_{1-x}\text{Zr}_x\text{O}_{2+y}\text{N}_{1-y}$  ( $0 \leq x \leq 1$ ): (a) Nb 3d, (b) O 1s, (c) N 1s, (d) Zr 3d.

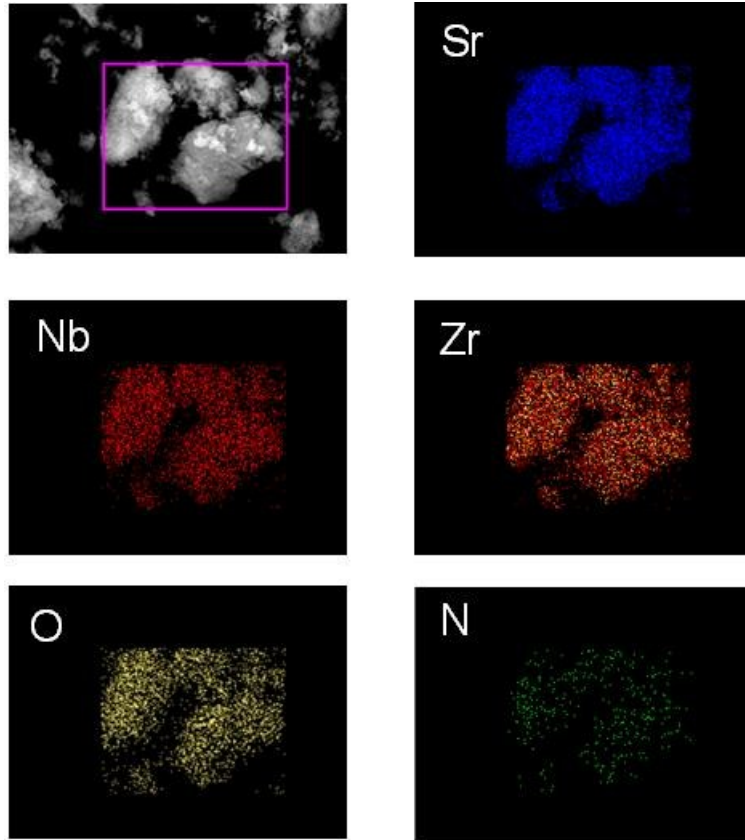

Figure S3. Element mapping of of  $\text{SrNb}_{0.2}\text{Zr}_{0.8}\text{O}_{2+y}\text{N}_{1-y}$  ( $x = 0.8$ ) under scanning electron microscopy conditions.

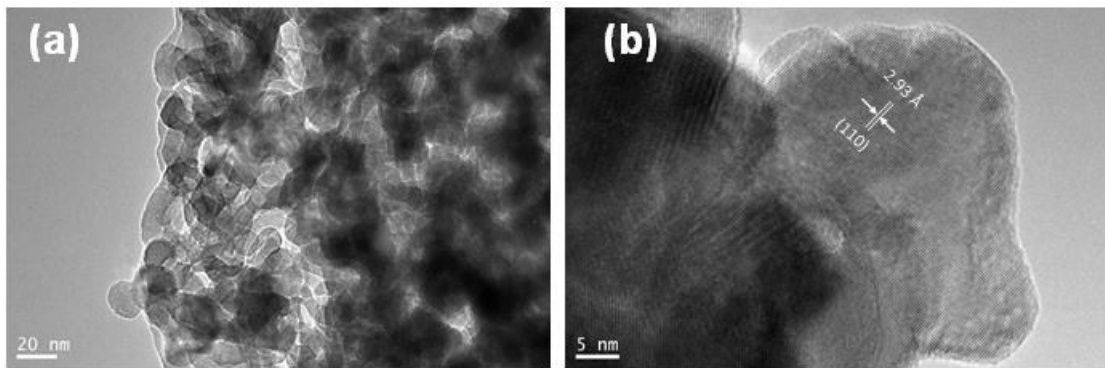

Figure S4. (a) Transmission electron microscopy (TEM) and (b) high resolution TEM images of  $\text{SrNb}_{0.2}\text{Zr}_{0.8}\text{O}_{2+y}\text{N}_{1-y}$  ( $x = 0.8$ ), lattice fringes marked corresponds to (110) planes.

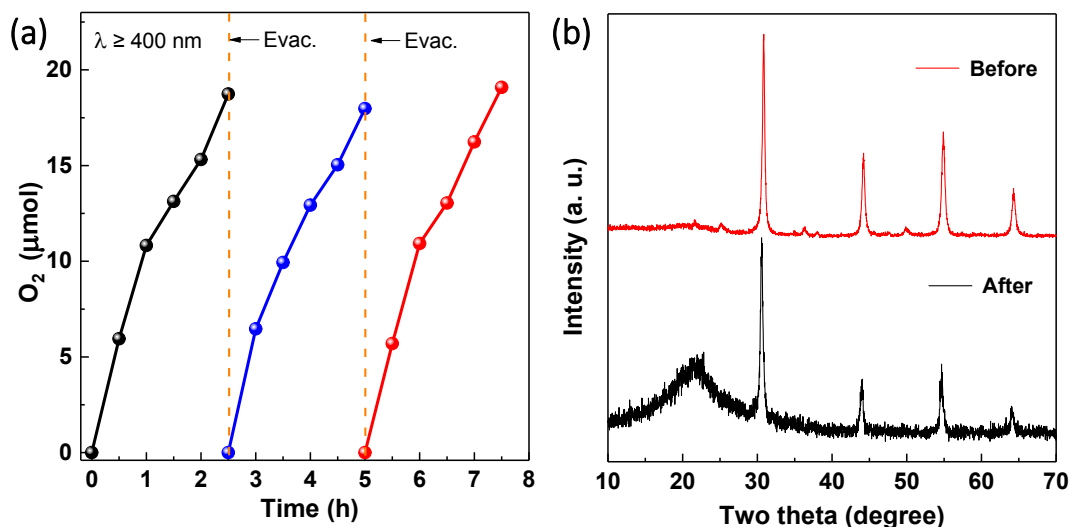

Figure S5. (a) Recycling tests for O<sub>2</sub> evolution on SrNb<sub>0.2</sub>Zr<sub>0.8</sub>O<sub>2+y</sub>N<sub>1-y</sub> (x = 0.8) under visible light illumination ( $\lambda \geq 400$  nm), 0.05 M Na<sub>2</sub>S<sub>2</sub>O<sub>8</sub> aqueous solutions and 1 wt% CoO<sub>x</sub> were used as a sacrificial agent and cocatalyst, respectively; (b) XRD of SrNb<sub>0.2</sub>Zr<sub>0.8</sub>O<sub>2+y</sub>N<sub>1-y</sub> (x = 0.8) after before and after photocatalytic experiment.

Table S1. AQE of oxynitride photocatalysts for O<sub>2</sub> evolution from aqueous solutions

| Photocatalyst                                                           | P.M              | Co-catalyst            | AQE (%) at 420 nm | Ref.      |
|-------------------------------------------------------------------------|------------------|------------------------|-------------------|-----------|
| SrNb <sub>0.2</sub> Zr <sub>0.8</sub> O <sub>2+y</sub> N <sub>1-y</sub> | PC               | 1 wt% CoO <sub>x</sub> | 1.44              | This work |
| CaNbO <sub>2</sub> N                                                    | PC               | -                      | 1.1               | 1         |
| LaTiO <sub>2</sub> N                                                    | PC               | 2 wt% IrO <sub>2</sub> | 1.5               | 2         |
| La <sub>0.3</sub> Ca <sub>0.7</sub> TiO <sub>2.7</sub> N <sub>0.3</sub> | Co-precipitation | 1 wt% CoO <sub>x</sub> | 3.13              | 3         |
| SrMg <sub>0.2</sub> Nb <sub>0.8</sub> O <sub>2+y</sub> N <sub>1-y</sub> | PC               | 1 wt% CoO <sub>x</sub> | 5.13              | 4         |
| LaTa <sub>0.9</sub> Zr <sub>0.1</sub> O <sub>1+y</sub> N <sub>2-y</sub> | PC               | 2 wt% CoO <sub>x</sub> | 0.93              | 5         |
| BaTaO <sub>2</sub> N                                                    | Flux             | 2 wt% CoO <sub>x</sub> | 0.24              | 6         |

P.M means preparation method. PC denotes polymerized complex method

## References

1. B. Siritanaratkul, K. Maeda, T. Hisatomi and K. Domen, Synthesis and Photocatalytic Activity of Perovskite Niobium Oxynitrides with Wide Visible-Light Absorption Bands, *ChemSusChem*, 2011, **4**, 74-78.
2. A. Kasahara, K. Nukumizu, G. Hitoki, T. Takata, J. N. Kondo, M. Hara, H. Kobayashi and K. Domen, Photoreactions on LaTiO<sub>2</sub>N under visible light irradiation, *J Phys Chem A*, 2002, **106**, 6750-6753.

3. F. F. Wu, G. Liu and X. X. Xu, Efficient photocatalytic oxygen production over Ca-modified LaTiO<sub>2</sub>N, *J. Catal.*, 2017, **346**, 10-20.
4. X. Q. Sun, G. Liu and X. X. Xu, Defect management and efficient photocatalytic water oxidation reaction over Mg modified SrNbO<sub>2</sub>N, *Journal of Materials Chemistry A*, 2018, **6**, 10947-10957.
5. Y. W. Wang, S. Jin, G. X. Pan, Z. X. Li, L. Chen, G. Liu and X. X. Xu, Zr doped mesoporous LaTaON<sub>2</sub> for efficient photocatalytic water splitting, *Journal of Materials Chemistry A*, 2019, **7**, 5702-5711.
6. M. Hojamberdiev, E. Zahedi, E. Nurlaela, K. Kawashima, K. Yubuta, M. Nakayama, H. Wagata, T. Minegishi, K. Domen and K. Teshima, The cross-substitution effect of tantalum on the visible-light-driven water oxidation activity of BaNbO<sub>2</sub>N crystals grown directly by an NH<sub>3</sub>-assisted flux method, *J. Mater. Chem. A*, 2016, **4**, 12807-12817.
